# Supplementary material
Source: Springer Nature journal article supplement (https://www.springermedizin.de/resource/supplementary/12889_2010_2499_MOESM1_ESM.pdf/9486172)
Supplement: MOESM1 [file 9486172]

RECRUITMENT

Referral

| GP DATABASE               | COMMUNITY REFERRAL      | MEDIA              | OTHER                             |
|---------------------------|-------------------------|--------------------|-----------------------------------|
| Screening invitation 2501 | General practitioner 47 | Poster/brochure 32 | Colleague, friend, acquaintance 9 |
| Contacted 1359            | Social work 23          | Advertisement 28   | Unknown 25                        |
| Total referred 1210       | Debt reform 11          | TV item 2          |                                   |
|                           | CMHC 20                 |                    |                                   |
|                           | PHS 3                   |                    |                                   |

Screening

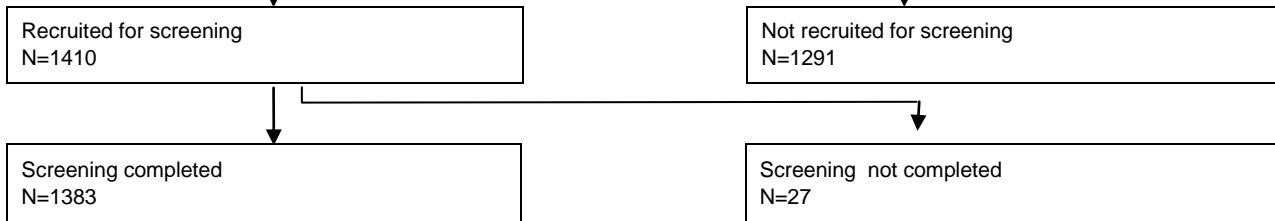

WILLINGNESS TO PARTICIPATE

Intake

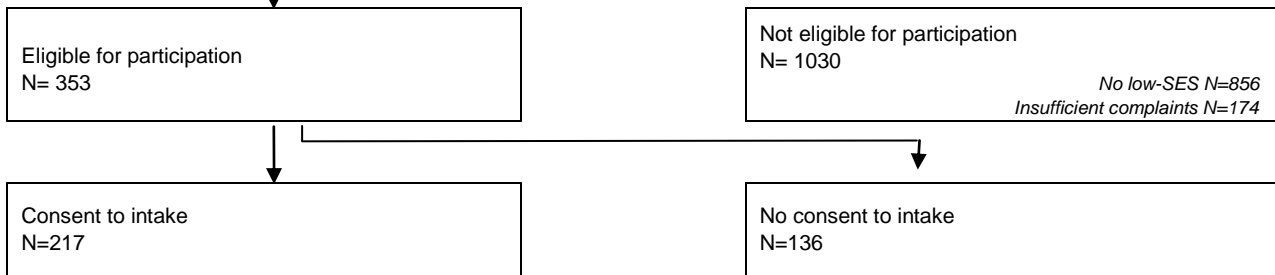

Course enrollment

Course participation

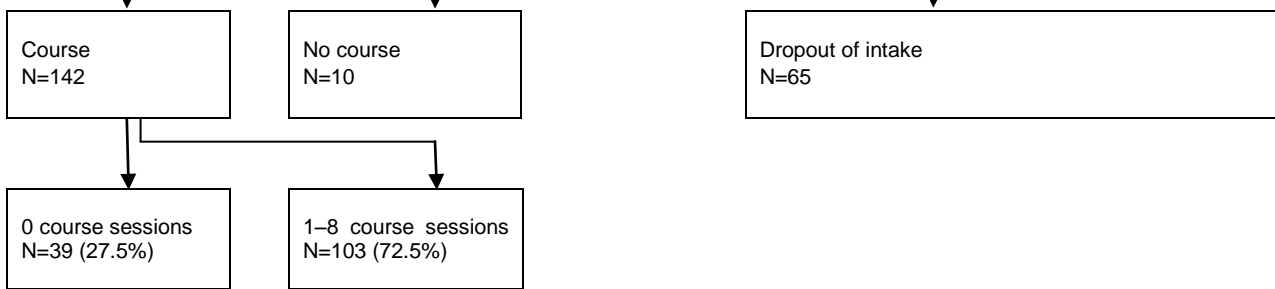

*No low-SES N=856  
Insufficient complaints N=174*
